# Supplementary material for: Human Adipose-Derived Stromal Cells Delivered on Decellularized Muscle Improve Muscle Regeneration and Regulate RAGE and P38 MAPK
Source: MDPI journal article supplement (doi:10.3390/bioengineering9090426), 2022-08-30
Supplement: s1 [file s1]

**Table S1.** Nanostring analysis of differentially expressed genes between Sham v. DMM and Sham v. Empty Defect. Genes shown are associated with a p-value of 0.05 or less.

| DMM Upregulated Genes | DMM Downregulated Genes | Empty Upregulated Genes | Empty Downregulated Genes |
|-----------------------|-------------------------|-------------------------|---------------------------|
| Ackr1                 | Gtf2ird1                | Acin1                   | Dlat                      |
| F2                    | Nova1                   | Angpt2                  | Dot1                      |
| Gria2                 |                         | Ap3s1                   |                           |
| Sf3b2                 |                         | Apoe                    |                           |
| Tbp                   |                         | App                     |                           |
|                       |                         | Arsa                    |                           |
|                       |                         | Atp6v0e1                |                           |
|                       |                         | Atp6v1a                 |                           |
|                       |                         | Bax                     |                           |
|                       |                         | Cacna1a                 |                           |
|                       |                         | Casp3                   |                           |
|                       |                         | Casp6                   |                           |
|                       |                         | Cers6                   |                           |
|                       |                         | Col6A1                  |                           |
|                       |                         | Ap                      |                           |
|                       |                         | Ctse                    |                           |
|                       |                         | Ep300                   |                           |
|                       |                         | ErbB3                   |                           |
|                       |                         | Erg                     |                           |
|                       |                         | Fn1                     |                           |
|                       |                         | Fus                     |                           |
|                       |                         | Gnai2                   |                           |
|                       |                         | Gnai3                   |                           |
|                       |                         | Gng2                    |                           |
|                       |                         | Grik2                   |                           |
|                       |                         | Grn                     |                           |
|                       |                         | Gss                     |                           |

|  |         |  |
|--|---------|--|
|  | Gtf2b   |  |
|  | Gusb    |  |
|  | Hdac1   |  |
|  | Hgf     |  |
|  | Hif1a   |  |
|  | Hmox1   |  |
|  | Htra2   |  |
|  | Idh1    |  |
|  | Itga5   |  |
|  | Itpr3   |  |
|  | Jam     |  |
|  | Jun     |  |
|  | Lama2   |  |
|  | Lama5   |  |
|  | Lamb2   |  |
|  | Lmna    |  |
|  | Lrp1    |  |
|  | Mapk3   |  |
|  | Mgmt    |  |
|  | Mmp2    |  |
|  | Myc     |  |
|  | Myh8    |  |
|  | Naglu   |  |
|  | Nf32l2  |  |
|  | Nr4a2   |  |
|  | Nsf     |  |
|  | Ntf3    |  |
|  | P2ry12  |  |
|  | Palm    |  |
|  | Pde1b   |  |
|  | Pik3r1  |  |
|  | Pla2g4a |  |
|  | Plcb1   |  |

|  |  |         |  |
|--|--|---------|--|
|  |  | Plcb4   |  |
|  |  | Plekho2 |  |
|  |  | Prkcsh  |  |
|  |  | Psen2   |  |
|  |  | Ptdss1  |  |
|  |  | Rhoa    |  |
|  |  | Rras    |  |
|  |  | Runx-2  |  |
|  |  | Scamp2  |  |
|  |  | Sirt7   |  |
|  |  | Slc11a1 |  |
|  |  | Spp1    |  |
|  |  | Src     |  |
|  |  | Sri     |  |
|  |  | Stat3   |  |
|  |  | Stx2    |  |
|  |  | Synj1   |  |
|  |  | Tcirg1  |  |
|  |  | Tgfb1   |  |
|  |  | Tgfbr2  |  |
|  |  | Trim28  |  |
|  |  | Trim37  |  |
|  |  | Trpm2   |  |
|  |  | Tspo    |  |
|  |  | Ugcg    |  |
|  |  | Xab2    |  |
|  |  | Cnot10  |  |
